# Supplementary material for: Novel Azetidine-Containing TZT-1027 Analogues as Antitumor Agents
Source: PubMed Central journal article supplement (PMC4882559; doi:10.3390/md14050085), 2016-04-28
Supplement: marinedrugs-14-00085-s001.pdf [file marinedrugs-14-00085-s001.pdf]

# Supplementary Materials: Novel Azetidine-Containing TZT-1027 Analogues as Antitumor Agents

Qi Yan, Yujie Wang, Wei Zhang and Yingxia Li

**Table S1.** Tumor volume (mm<sup>3</sup>, mean ± SD).

| Days<br>Drug        | 1                 | 4                  | 7                  | 10                 | 13                 | 16                 | 19                 | 22                 |
|---------------------|-------------------|--------------------|--------------------|--------------------|--------------------|--------------------|--------------------|--------------------|
| Vechile             | 148.43<br>± 76.26 | 220.42 ±<br>123.57 | 320.04 ±<br>150.33 | 412.44 ±<br>205.16 | 539.89 ±<br>264.96 | 725.23 ±<br>354.36 | 876.64 ±<br>389.87 | 992.21 ±<br>409.61 |
| TZT-1027<br>2 mg/kg | 147.31<br>± 75.97 | 182.59 ±<br>71.09  | 196.64 ±<br>68.59  | 232.81 ±<br>85.13  | 275.81 ±<br>98.38  | 301.7 ±<br>95.66   | 346.59 ±<br>143.7  | 363.71 ±<br>153.23 |
| 1a<br>1 mg/kg       | 149.56<br>± 73.72 | 185.88 ±<br>97.45  | 248.97 ±<br>144.16 | 341.75 ±<br>193.56 | 395.43 ±<br>199.2  | 530.82 ±<br>282.06 | 563.52 ±<br>321.07 | 662.64 ±<br>349.93 |
| 1a<br>2 mg/kg       | 16.16 ±<br>65.45  | 214.97 ±<br>104.56 | 287.02 ±<br>19.15  | 381.31 ±<br>124.24 | 508.66 ±<br>190.2  | 682.39 ±<br>265.79 | 813.25 ±<br>314.51 | 862.75 ±<br>456.75 |
| 1a<br>5 mg/kg       | 205.7 ±<br>95.63  | 266.39 ±<br>96.35  | 287.02 ±<br>83.11  | 380.17 ±<br>106.77 | 487.47 ±<br>110.65 | 554.26 ±<br>183.69 | 668.46 ±<br>210.57 | 789.59 ±<br>252.71 |

**Table S2.** Relative tumor volume (mean ± SD).

| Days<br>Drug        | 1 | 4           | 7           | 10          | 13          | 16          | 19          | 22          |
|---------------------|---|-------------|-------------|-------------|-------------|-------------|-------------|-------------|
| Vechile             | 1 | 1.54 ± 0.53 | 2.39 ± 0.94 | 3 ± 1.06    | 3.94 ± 1.33 | 5.34 ± 1.99 | 6.47 ± 2.15 | 7.49 ± 2.8  |
| TZT-1027<br>2 mg/kg | 1 | 1.32 ± 0.4  | 1.48 ± 0.64 | 1.73 ± 0.78 | 2.09 ± 0.9  | 2.3 ± 0.9   | 2.6 ± 1.33  | 2.66 ± 1.11 |
| 1a<br>1 mg/kg       | 1 | 1.27 ± 0.37 | 1.65 ± 0.57 | 2.29 ± 0.76 | 2.69 ± 0.9  | 3.62 ± 1.05 | 3.86 ± 1.34 | 4.69 ± 1.74 |
| 1a<br>2 mg/kg       | 1 | 1.3 ± 0.22  | 1.8 ± 0.31  | 2.44 ± 0.46 | 3.22 ± 0.6  | 4.34 ± 0.97 | 5.15 ± 1.13 | 5.5 ± 2.15  |
| 1a<br>5 mg/kg       | 1 | 1.37 ± 0.34 | 1.53 ± 0.41 | 2.05 ± 0.62 | 2.7 ± 0.88  | 2.97 ± 0.91 | 3.51 ± 0.82 | 4.19 ± 1.41 |

**Table S3.** Tumor growth inhibition (%).

| Days<br>Drug        | 1            | 4            | 7               | 10             | 13           | 16             | 19           | 22              |
|---------------------|--------------|--------------|-----------------|----------------|--------------|----------------|--------------|-----------------|
| TZT-1027<br>2 mg/kg | 0.94 ± 0.04  | 4.99 ± 0.46  | 30.97 ±<br>0.38 | 1.73 ±<br>0.78 | 45.53 ± 0.2  | 53.94 ±<br>0.2 | 58.24 ± 0.2  | 61.94 ±<br>0.17 |
| 1a<br>1 mg/kg       | -2.62 ± 0.17 | 10.68 ± 0.25 | 24.25 ±<br>0.23 | 2.29 ±<br>0.76 | 27.09 ± 0.15 | 28.02 ±<br>0.1 | 37.7 ± 0.13  | 34.79 ±<br>0.11 |
| 1a<br>2 mg/kg       | 1.97 ± 0.19  | 7.39 ± 0.15  | 11.09 ± 0.3     | 2.44 ±<br>0.46 | 8.85 ± 0.31  | 7.12 ±<br>0.27 | 11.14 ± 0.26 | 16.04 ±<br>0.35 |
| 1a<br>5 mg/kg       | 3.03 ± 0.23  | -3.5 ± 0.36  | 17.97 ±<br>0.31 | 2.05 ±<br>0.62 | 17.78 ± 0.28 | 27.44 ±<br>0.3 | 33.4 ± 0.22  | 29.7 ±<br>0.3   |

**Table S4.** Solubility of 1a.

| Solubility (Distilled Water, pH 7.4) |           |
|--------------------------------------|-----------|
| 1a                                   | 346 µg/mL |

**Table S5.** Apparent intrinsic clearance values of 1a (Dose: 1 µM).

| Compound                | T <sub>1/2</sub> (min,<br>Human) | Cl <sub>int</sub> (mL/min/kg,<br>Human) | T <sub>1/2</sub> (min,<br>Rat) | Cl <sub>int</sub><br>(mL/min/kg,<br>Rat) | T <sub>1/2</sub> (min,<br>Mouse) | Cl <sub>int</sub><br>(mL/min/kg,<br>Mouse) |
|-------------------------|----------------------------------|-----------------------------------------|--------------------------------|------------------------------------------|----------------------------------|--------------------------------------------|
| 1a                      | 18.71                            | 92.93                                   | 9.48                           | 262.12                                   | 1.83                             | 2981.16                                    |
| Ketanserin <sup>a</sup> | 43.86                            | 39.63                                   | 15.62                          | 159.00                                   | 13.54                            | 402.92                                     |

<sup>a</sup> ketanserin is the reference compound.
